# Supplementary material for: X-ray Microtomography for Investigating Pore Space and Its Relation to Water Retention and Conduction in Highly Weathered Soils
Source: MDPI journal article supplement (doi:10.3390/agriculture13010028), 2022-12-22
Supplement: s1 [file s1]

## Supplementary Material

**Table S1.** Chemical and mineralogical characterization of the Oxisols [21].

| Soils | pH <sub>KCl</sub>  | pH <sub>H<sub>2</sub>O</sub> | ΔpH        | CEC         | H+Al                               | Al <sup>3+</sup>               | Ca <sup>2+</sup>               | Mg <sup>2+</sup>               | K <sup>+</sup>                   | SB        | P                   |
|-------|--------------------|------------------------------|------------|-------------|------------------------------------|--------------------------------|--------------------------------|--------------------------------|----------------------------------|-----------|---------------------|
|       |                    |                              |            |             | cmol <sub>c</sub> kg <sup>-1</sup> |                                |                                |                                |                                  |           | mg kg <sup>-1</sup> |
| P1    | 5.24±0.05          | 5.30±0.02                    | -0.05±0.05 | 4.51±0.15   | 4.08±0.11                          | 0.43±0.03                      | 0.26±0.03                      | 0.14±0.02                      | 0.04±0.005                       | 0.44±0.05 | 1.01±0.11           |
| P2    | 5.30±0.02          | 5.27±0.03                    | 0.03±0.02  | 3.34±0.10   | 3.19±0.10                          | 0.47±0.02                      | 0.05±0.01                      | 0.07±0.02                      | 0.03±0.004                       | 0.15±0.02 | 0.76±0.07           |
| P3    | 4.18±0.03          | 4.64±0.05                    | -0.46±0.03 | 9.37±0.61   | 8.98±0.64                          | 2.08±0.23                      | 0.08±0.03                      | 0.28±0.15                      | 0.04±0.001                       | 0.40±0.17 | 0.93±0.14           |
| Solos | K                  | Gb                           | Gt         | Hm          | CBD                                |                                | OAA                            |                                | SOC                              |           |                     |
|       |                    |                              |            |             | Fe <sub>2</sub> O <sub>3</sub>     | Al <sub>2</sub> O <sub>3</sub> | Fe <sub>2</sub> O <sub>3</sub> | Al <sub>2</sub> O <sub>3</sub> | Fe <sub>o</sub> /Fe <sub>d</sub> |           | g kg <sup>-1</sup>  |
|       | g kg <sup>-1</sup> |                              |            |             | g kg <sup>-1</sup>                 |                                |                                |                                |                                  |           |                     |
| P1    | 227.20±6.52        | 285.56±5.53                  | 70.20±6.37 | 120.58±6.37 | 190.78±4.43                        | 13.89±0.62                     | 0.93±0.05                      | 1.27±0.05                      | 0.003                            |           | 9.71±0.83           |
| P2    | 370.37±4.34        | 209.02±3.35                  | 51.48±7.28 | 132.52±7.28 | 184.00±1.46                        | 11.55±0.26                     | 0.81±0.13                      | 0.83±0.04                      | 0.003                            |           | 7.10±0.93           |
| P3    | 218.43±5.89        | 169.99±0.02                  | 72.68±1.65 | 50.16±1.65  | 122.84±1.43                        | 25.25±3.16                     | 0.61±0.07                      | 1.51±0.05                      | 0.004                            |           | 16.96±1.03          |

K: kaolinite; Gb: gibbsite; Gt: goethite; Hm: hematite; CBD: citrate-bicarbonate-dithionite method; OAA: ammonium oxalate method; SOC: soil organic carbon; Fe<sub>o</sub>/Fe<sub>d</sub>: ratio of poorly and well crystallized iron oxides. Methods described in [32] and detailed in [21]. Mean values were compared with their respective 95% confidence intervals.

**Table S2.** Additional information about the general description of the Oxisols and the Bw horizons studied.

|                                                                                                                                                               |                                                                                                                                                                                                                                                                                                                                                                                                                                                                                                                                        |
|---------------------------------------------------------------------------------------------------------------------------------------------------------------|----------------------------------------------------------------------------------------------------------------------------------------------------------------------------------------------------------------------------------------------------------------------------------------------------------------------------------------------------------------------------------------------------------------------------------------------------------------------------------------------------------------------------------------|
| <p><b>(P1) Latossolo Vermelho Distroférico típico/Rhodic Haplustox</b></p>  | <p>Bw 110 cm - red (10 R 2.5/2, wet); very clayey; small to very small microgranular (microaggregates); friable; plastic and sticky.</p> <p>Additional information about Bw horizon of soil profile:</p> <p>Structure: Gr</p> <p>Size: Very small</p> <p>Degree: Strong</p> <p>Mineralogy: K, Gb, Gt, Hm</p> <p>Ratio – Hm/(Hm+Gt): 0.63</p> <p>K: kaolinite; Gb: gibbsite; Hm: hematite; Gt: goethite; Hm/(Hm + Gt) relations between minerals; Gr: microgranular structure.</p> <p>Profile described by: Thaís Nascimento Pessoa</p> |
|---------------------------------------------------------------------------------------------------------------------------------------------------------------|----------------------------------------------------------------------------------------------------------------------------------------------------------------------------------------------------------------------------------------------------------------------------------------------------------------------------------------------------------------------------------------------------------------------------------------------------------------------------------------------------------------------------------------|

**(P2) Latossolo Vermelho Acriférrico típico/Anionic Acrustox**

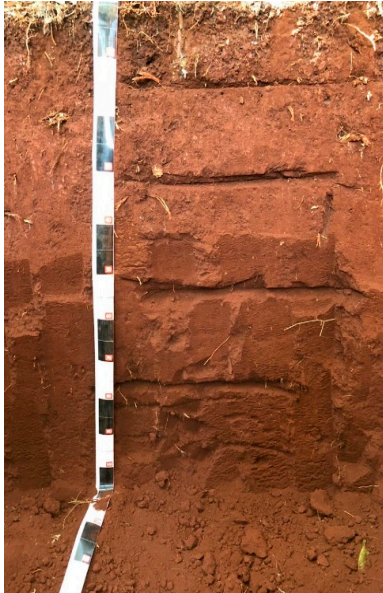

Bw 80+ cm - red (2.5 YR 2.5/3, wet); very clayey; medium subangular block that breaks up into small to very small microgranular (microaggregates); friable; plastic and slightly sticky.

Additional information about Bw horizon of soil profile:

Structure: Sb

Size: Small

Degree: Moderate

Mineralogy: K, Gb, Gt, Hm

Ratio -  $Hm/(Hm+Gt)$ : 0.72

K: kaolinite; Gb: gibbsite; Hm: hematite; Gt: goethite;  $Hm/(Hm + Gt)$  relations between minerals; Sb: structure in subangular blocks, that breaks up into very small microgranular.

Observations: intense biological activity in the profile.

Profile described by: Thaís Nascimento Pessoa

**(P3) Latossolo Bruno Distrófico típico/Typic Hapludox**

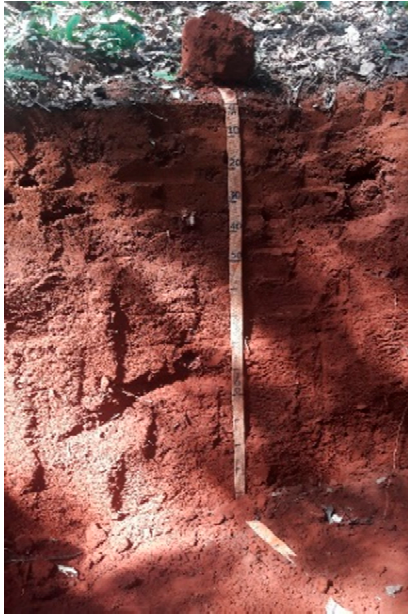

Bw1 135 - 170 cm - red (2.5 YR 4/6, wet); very clayey; moderate large subangular block that crumbles into small to very small subangular block (microaggregates); friable; very plastic and very sticky; diffuse and clear transition.

Additional information about Bw horizon of soil profile:

Structure: Sb

Size: Large/moderate

Degree: Strong

Mineralogy: K, Gb, Gt, Hm, V

Ratio -  $Hm/(Hm+Gt)$ : 0.72

K: kaolinite; Gb: gibbsite; Hm: hematite; Gt: goethite; V: vermiculite with hydroxy-Al;  $Hm/(Hm + Gt)$  relations between minerals; Sb: structure in subangular blocks.

Observations: intense termite biological activity throughout the profile.

Profile described by: Flávio A. Marques and Márcia Regina Calegari

**Table S3.** Pearson's correlation matrix for pore size distribution, parameters from 3D image analysis, and physical, chemical, and mineralogical attributes.

|                       | 20-100 $\mu\text{m}$ | 100-300 $\mu\text{m}$ | 300-500 $\mu\text{m}$ | 500-700 $\mu\text{m}$ | >700 $\mu\text{m}$ | FC     | PWP    | K <sub>sat</sub> | EN <sub>total</sub> | EN <sub>big</sub> | SurfDens | SOC   | Clay  | SSA   | Gt     | Hm   | Gb    | K |
|-----------------------|----------------------|-----------------------|-----------------------|-----------------------|--------------------|--------|--------|------------------|---------------------|-------------------|----------|-------|-------|-------|--------|------|-------|---|
| 20-100 $\mu\text{m}$  | 1                    |                       |                       |                       |                    |        |        |                  |                     |                   |          |       |       |       |        |      |       |   |
| 100-300 $\mu\text{m}$ | -0.20                | 1                     |                       |                       |                    |        |        |                  |                     |                   |          |       |       |       |        |      |       |   |
| 300-500 $\mu\text{m}$ | -0.84                | 0.70                  | 1                     |                       |                    |        |        |                  |                     |                   |          |       |       |       |        |      |       |   |
| 500-700 $\mu\text{m}$ | -0.99                | 0.29                  | 0.89                  | 1                     |                    |        |        |                  |                     |                   |          |       |       |       |        |      |       |   |
| >700 $\mu\text{m}$    | -0.22                | -0.91                 | -0.35                 | 0.12                  | 1                  |        |        |                  |                     |                   |          |       |       |       |        |      |       |   |
| FC                    | -1.00                | 0.29                  | 0.89                  | 0.99*                 | 0.12               | 1      |        |                  |                     |                   |          |       |       |       |        |      |       |   |
| PWP                   | -0.99                | 0.33                  | 0.91                  | 0.99*                 | 0.08               | 0.99*  | 1      |                  |                     |                   |          |       |       |       |        |      |       |   |
| K <sub>sat</sub>      | 0.99                 | -0.35                 | -0.91                 | -0.99*                | -0.06              | -0.99* | -0.99* | 1                |                     |                   |          |       |       |       |        |      |       |   |
| EN <sub>total</sub>   | -0.10                | -0.95                 | -0.46                 | 0.01                  | 0.99               | 0.01   | -0.03  | 0.05             | 1                   |                   |          |       |       |       |        |      |       |   |
| EN <sub>big</sub>     | -0.99*               | 0.25                  | 0.87                  | 0.99*                 | 0.17               | 0.99*  | 1.00   | -0.99            | 0.05                | 1                 |          |       |       |       |        |      |       |   |
| SurfDens              | 0.98                 | -0.38                 | -0.93                 | -0.99                 | -0.03              | -0.99  | -0.99* | 0.99*            | 0.09                | -0.99             | 1        |       |       |       |        |      |       |   |
| SOC                   | -0.98                | 0.00                  | 0.72                  | 0.96                  | 0.41               | 0.96   | 0.94   | -0.94            | 0.30                | 0.97              | -0.93    | 1     |       |       |        |      |       |   |
| Clay                  | -0.79                | 0.75                  | 1.00                  | 0.85                  | -0.42              | 0.85   | 0.87   | -0.88            | -0.53               | 0.82              | -0.89    | 0.66  | 1     |       |        |      |       |   |
| SSA                   | -0.97                | 0.44                  | 0.95                  | 0.99                  | -0.04              | 0.99   | 0.99   | -0.99            | -0.16               | 0.98              | -0.99*   | 0.90  | 0.92  | 1     |        |      |       |   |
| Gt                    | -0.64                | -0.63                 | 0.12                  | 0.56                  | 0.89               | 0.56   | 0.53   | -0.51            | 0.83                | 0.60              | -0.48    | 0.78  | 0.04  | 0.42  | 1      |      |       |   |
| Hm                    | 0.99*                | -0.13                 | -0.80                 | -0.99                 | -0.29              | -0.99  | -0.98  | 0.97             | -0.18               | -0.99             | 0.97     | -0.99 | -0.75 | -0.95 | -0.69  | 1    |       |   |
| Gb                    | 0.72                 | -0.82                 | -0.98                 | -0.78                 | 0.52               | -0.78  | -0.81  | 0.82             | 0.62                | -0.75             | 0.84     | -0.57 | -0.99 | -0.87 | 0.08   | 0.66 | 1     |   |
| K                     | 0.59                 | 0.67                  | -0.06                 | -0.51                 | -0.91              | -0.51  | -0.48  | 0.46             | -0.86               | -0.55             | 0.43     | -0.74 | 0.02  | -0.37 | -0.99* | 0.65 | -0.13 | 1 |

FC: field capacity (-10 kPa); PWP: permanent wilting point (-1500 kPa); K<sub>sat</sub>: saturated hydraulic conductivity; EN<sub>total</sub>: Euler number for total sample; EN<sub>big</sub>: Euler number for the biggest connected pore; SurfDens: surface density; SOC: soil organic carbon; SSA: specific surface area; Gt: goethite; Hm: hematite; Gb: gibbsite; K: kaolinite. \*Significant for  $p < 0.05$ .

**Table S4.** Results of eigenvalues and eigenvectors extracted from the principal components analysis (PCA).

| <b>Variables</b>         | <b>PC1</b> | <b>PC2</b> |
|--------------------------|------------|------------|
| Eigenvalues              | 12.65      | 5.35       |
| Explained variance (%)   | 70.28      | 29.72      |
| Accumulated variance (%) | 70.28      | 100        |
| <b>Eigenvectors</b>      |            |            |
| 100-20 $\mu\text{m}$     | -0.28      | -0.06      |
| 100-300 $\mu\text{m}$    | 0.10       | -0.41      |
| 300-500 $\mu\text{m}$    | 0.26       | -0.18      |
| 500-700 $\mu\text{m}$    | 0.28       | 0.02       |
| >700 $\mu\text{m}$       | 0.02       | 0.43       |
| FC                       | 0.28       | 0.02       |
| PWP                      | 0.28       | 0.00       |
| K <sub>sat</sub>         | -0.28      | 0.00       |
| EN <sub>total</sub>      | -0.01      | 0.43       |
| EN <sub>big</sub>        | 0.28       | 0.04       |
| SurfDens                 | -0.28      | 0.02       |
| SOC                      | 0.26       | 0.15       |
| Clay                     | 0.25       | -0.21      |
| SSA                      | 0.28       | -0.05      |
| Gt                       | 0.15       | 0.37       |
| Hm                       | -0.27      | -0.09      |
| Gb                       | -0.23      | 0.25       |
| K                        | -0.13      | -0.38      |
